1 **Title: Non-canonical *Drosophila* X chromosome dosage compensation and repressive**  
2 **topologically-associated domains.**

3  
4 Authors: Hangnoh Lee and Brian Oliver

5  
6 Laboratory of Cellular and Developmental Biology, National Institute of Diabetes and Kidney and  
7 Digestive Diseases, National Institutes of Health, Bethesda, Maryland, USA

8 Email addresses:

9 [hangnoh.lee@nih.gov](mailto:hangnoh.lee@nih.gov) (HL), [briano@niddk.nih.gov](mailto:briano@niddk.nih.gov) (BO)

10

11 **Abstract**

12 **Background:** In animals with XY sex chromosomes, X-linked genes from a single X  
13 chromosome in males are imbalanced relative to autosomal genes. To minimize the impact of  
14 genic imbalance in male *Drosophila*, there is a dosage compensation complex (MSL), that  
15 equilibrates X-linked gene expression with the autosomes. There are other potential  
16 contributions to dosage compensation. Hemizygous autosomal genes located in repressive  
17 chromatin domains are often de-repressed. If this homolog-dependent repression occurs on the  
18 X, which has no pairing partner, then de-repression could contribute to male dosage  
19 compensation.

20 **Results:** We asked whether different chromatin states or topological associations correlate with  
21 X chromosome dosage compensation, especially in regions with little MSL occupancy. Our  
22 analyses demonstrated that male X chromosome genes that are located in repressive chromatin  
23 states are depleted of MSL occupancy, however they show dosage compensation. The genes  
24 in these repressive regions were also less sensitive to knockdown of MSL components.

25 **Conclusions:** Our results suggest that this non-canonical dosage compensation is due to the  
26 same trans-acting de-repression that occurs on autosomes. This mechanism would facilitate  
27 immediate compensation during the evolution of sex chromosomes from autosomes. This  
28 mechanism is similar to that of *C. elegans*, where enhanced recruitment of X chromosomes to  
29 the nuclear lamina dampens X chromosome expression as part of the dosage compensation  
30 response in XX individuals.

31

32 **Keywords**

33 Dosage Compensation, *Drosophila melanogaster*, MSL complex, Topologically-associated  
34 domain, Lamina-associated domain

## 35 **Background**

36

37 Genes come in pairs and large-scale deviation from this state is detrimental, most probably as a  
38 result of disrupted gene expression balance [1,2]. Sex chromosomes are a peculiar exception  
39 to this general rule. In *XY* systems, males have what amounts to a heterozygous deletion of an  
40 entire chromosome, bearing ~20% of the genes in the case of *Drosophila*, with no impact on  
41 fitness. In such systems, compensation often rectifies gene dose effects as a way to maintain  
42 gene balance [3–5].

43

44 In *Drosophila melanogaster*, a male-specific complex called the Male Specific Lethal (MSL)  
45 complex, plays a role in increasing expression of genes from the single *X* chromosome relative  
46 to autosomes. MSL and perhaps other unidentified sources of compensation ultimately achieve  
47 remarkably equalized levels of *X*-linked gene expression in males with one *X* and females with  
48 two *X*s, as well as balancing *X* expression with the autosomes [6,7]. This boosting of  
49 expression by MSL complex is primarily achieved via enhanced elongation of transcription [8],  
50 but there also is evidence that RNA polymerase II (PolII) binding is increased by 1.2 fold at male  
51 *X* chromosome promoters [9–11]. The complex includes MSL-1, MSL-2, and MSL-3 proteins,  
52 Maleless (MLE), and Males absent on the first (MOF) proteins, and two non-coding RNAs, *roX1*  
53 and *roX2* [12]. MOF has a histone acetyltransferase activity and functions in enhanced  
54 elongation of *X* chromosome gene transcription by acetylating histone H4K16 (H4K16Ac) [8].  
55 Binding of MSL complex to the male *X* chromosome occurs at Chromosome Entry Sites (CES),  
56 also referred to as High-Affinity Sites (HAS) [13,14]. The sites contain GA-rich sequences,  
57 called the MSL-recognition element (MRE) [14].

58

59 A related scheme for *X* chromosome dosage compensation occurs in *C. elegans*, where *XX*  
60 worms are hermaphrodites and *X0* worms are males. In *X0* males, yield of *X* chromosome  
61 gene products is increased using various mechanisms (e.g. increased PolII recruitment, mRNA  
62 stability, or translation rate) in both males and hermaphrodites [15–18]. However, solving the  
63 gene production difference between autosomes and *X* chromosomes in males results in over-  
64 expression in *XX* animals. To manage this increased activity, *XX* hermaphrodite *C. elegans*  
65 have a dosage compensation complex that represses gene expression from both *X*  
66 chromosomes [5,16]. The *C. elegans* Dosage Compensation Complex (DCC) targets the *X*  
67 chromosomes and spreads from recruitment sites on the *X* [19]. Recruitment of DCC on *X*  
68 chromosome is linked to increased mono-methylation of histone H4K20 (H4K20me1) [20,21], as

69 well as depletion of histone modifications that mark active transcription, such as H4K16Ac  
70 [16,22,23], and H2A.Z variant histone [24]. These epigenetic changes accompany topological  
71 remodeling of the *X* chromosomes [25] and reduced PolIII recruitment at *X*-linked promoters in  
72 hermaphrodites. [3,5,26]. This remodeling includes nuclear sub-localization of the *X*  
73 chromosomes to the lamina, which is generally repressive. Disruption of the anchoring between  
74 heterochromatin and nuclear lamina re-localized *X* chromosomes more centrally in the nucleus  
75 and results in partial de-repression of the *X*-linked genes [27]. The modulation of H4K16Ac in  
76 animals with a single *X* is a conserved characteristic between *D. melanogaster* and *C. elegans*  
77 [22] although the *XX* mechanisms differ [23].

78  
79 Intriguingly, nuclear architecture-level de-repression also occurs in autosomal dosage  
80 compensation in *D. melanogaster*. Genes within repressive “topologically associated domains”  
81 (TADs), which include Lamina-associated domains (LADs) involved in dosage compensation in  
82 *C. elegans* hermaphrodites, show better autosomal dosage compensation in *Drosophila*  
83 hemizygotes [28]. The effect of autosomal deletions is de-repression of the non-deleted genes  
84 *in trans*, as well as a spreading of de-repression into flanking regions within the LAD. This  
85 suggests that these repressive domains are built based on additive or synergistic cooperation  
86 between gene homologs. This observation is of particular interest for two reasons. First, the  
87 necessity of two homologs for the repression is reminiscent of chromosomal pairing-dependent  
88 events, such as pairing-sensitive silencing [29,30], or transvection [31,32]. In transvection, the  
89 existence of homologous chromosome in proximity leads to enhancer action *in trans* or insulator  
90 bypass *in cis* [31]. As such, chromosomal pairing may provide a mechanistic basis of how  
91 autosomal deletions result in the de-repression of non-deleted genes [28]. The absence of a  
92 pairing partner for the single *X* in males might therefore be consequential. Second, the  
93 repression at the two-dose state, and de-repression at one-dose state, is analogous to *X*  
94 chromosome dosage compensation in *C. elegans*. This led us to ask if the de-repression of  
95 one-dose genes from repressive domains occurs on *D. melanogaster X* chromosomes. If so,  
96 this would contribute to dosage compensation in males.

97

## 98 **Results**

99

100 **X-linked repressive TADs genes display low expression levels, but are dosage**  
101 **compensated in males.**

102

103 To determine the overall structure of chromatin domains on the X, we used results from three  
104 previous studies that divided genome into repressive vs. non-repressive chromatin  
105 domains/TADs and LADs vs. non-LADs. LAD and DamID (DNA adenine methyltransferase  
106 Identification) based chromatin occupancy information was from *Kc* cells [33,34]. TAD  
107 information was from Hi-C conformation capture from mixed sex embryos [35]. From the Hi-C  
108 study, “Null” TADs were characterized by general lack of chromatin marks, except for a weakly  
109 enriched binding of an insulator protein, Suppressor of Hairy-wing [SU(HW)]. The LAD and  
110 “Null” TADs correspond and largely overlap with “Black” domain DamID work. The “Black”  
111 domain has increased signals of Histone H1, Effete (EFF), Suppressor of Under-Replication  
112 (SUUR) and Lamin B protein binding. These repressive TADs are known to share various  
113 characteristics [35], and there are significant overlaps among the identified gene sets (**Figure**  
114 **1A**). For example, 63% of genes that are in LADs are also in Black domains, and 78% of genes  
115 that are in Black domains are in Null domains. We collectively refer to these overlapping  
116 domains as “repressive TADs”.

117  
118 Each of these three repressive TADs covered 23 to 47% of the protein-coding genes in the  
119 *Drosophila* genome. To describe which genes on the X were in repressive TADs, we parsed by  
120 chromosome (**Figure 1B**). Collectively, genes within LADs included 38% of X chromosome  
121 genes and 29% of autosomal genes ( $p = 1.19e-06$ , Fisher’s exact test). Genes within Null  
122 domains included 45% of X chromosome genes and 47% of autosomal genes ( $p = 0.25$ ).  
123 Genes within Black domains included 33% of X chromosome genes and 35% of autosomal  
124 genes ( $p = 0.076$ ). Clearly, a large fraction of the genome, including the X, are in repressive  
125 domains. If these genes are simply “off”, then asking if they are dosage compensated is a futile  
126 effort ( $2 \times 0 = 0$ ). Therefore, we carefully examined expression levels from genes that are within  
127 the repressive domains to see if we could reliably detect expression. We used previously  
128 reported expression data for this analysis [36,37]. Expression levels in repressive domains  
129 were reassuringly lower than in non-repressive domains. We found these trends of lower  
130 expression in repressive-TAD genes when we investigated different cell lines (**Figure 1C-E**) and  
131 sexed salivary glands (**Figure 1F-H**), but there was clear evidence of expression.

132  
133 Determining the difference between low and off is critical for this analysis. We measured the  
134 biological and technical noise levels by measuring intergenic signals (**Figure 1C-E**). The 99th  
135 percentiles for intergenic signal were 0.87 Fragments Per Kilobase of transcript per Million  
136 mapped reads (FPKM) in S2 cells (male) and 0.98 FPKM in *Kc* cells (female). This is in stark

137 contrast to expression levels in the repressive TADs from *Kc* cells, where LAD and Black  
138 domains were determined (**Figure 1C-E**, the top panel). The median gene expression level was  
139 9.1 FPKM for genes within LADs and 16.1 FPKM for genes within Null domains. Genes in  
140 Black domains showed lower expression at a median of 2.8 FPKM, but all of these expression  
141 levels far exceed our estimates of noise. In *Kc* cells, approximately 19.6% and 40.4% of the *X*-  
142 linked genes demonstrate gene expression above the cutoff levels from LAD and Null domains,  
143 respectively. Only 5.7% of the *X*-linked genes were expressed from Black domains, indicating  
144 that the Black domain has the most repressive characteristics among three different calls of  
145 repressive TADs. Autosomal genes from repressive TADs also displayed lower gene  
146 expression levels compared to non-repressive TAD genes with 9.7 (LAD), 16.1 (Null), and 2.7  
147 FPKMs (Black), which are not significantly different from repressive TAD genes on the *X* ( $p >$   
148 0.2, Mann-Whitney U test). In male *S2* cells, the repressive TAD genes demonstrated 9.8  
149 (LAD), 15.4 (Null), and 5.1 FPKMs (Black), underscoring that repressive TAD genes on the *X*  
150 have comparable expression levels between *S2* and *Kc* cells ( $p > 0.05$ , **Figure 1C-E**), and are  
151 thus dosage compensated. We made a similar observation from sexed salivary glands. A large  
152 fraction of genes from repressive TADs showed higher expression than the technical noise  
153 level, which we determined based on background signals from the control probes of  
154 microarrays (**Figure 1F-H**, normalized intensities of approximately 2.3 in both sexes). For  
155 example, about 27.4% and 26.6% of the total *X*-linked LAD genes showed gene expression  
156 above the background levels in female and male salivary glands, respectively. Thus, we were  
157 confident that we could make meaningful measurements of dosage compensation among those  
158 genes. Briefly, a substantial portion of the genes in repressive TAD domains showed detectable  
159 levels of gene expression. We used these genes in our analysis.

160  
161 Genes in repressive TADs demonstrated comparable expression levels between female (*Kc*)  
162 and male (*S2*) cells from the *X* (**Figure 1C-E**), indicating that they are dosage compensated. To  
163 confirm that male *X*-linked genes are dosage compensated in repressive TADs, we compared  
164 expression profiles from salivary glands, where female and male were matched siblings. From  
165 microarray results, we observed that male *X*-linked genes from LAD regions demonstrated  
166 comparable expression levels to that of females (**Figure 1I**). The median signal intensity from  
167 male *X*-linked genes was 3.41, which did not differ from that of female (3.58,  $p = 0.917$ ) despite  
168 the 50% difference in *X* gene dose. We obtained similar equilibrated expression of the *X* from  
169 other repressive TADs. *X* chromosome genes in the Null domains showed a median of 5.51  
170 signal intensity in *X* males when it was 5.31 in *XX* females. Black domain genes had medians

171 of 2.68 and 2.64 signal intensities in *X* males and *XX* females, respectively. Overall gene  
172 expression signals from autosomes were consistent between two sexes (6.52,  $p > 0.996$  for  
173 differential expression). Therefore, the repressive TAD genes are dosage compensated in  
174 males.

175

### 176 **Repressive TAD genes lack MSL complex binding**

177

178 *X* specific dosage compensation has canonical and non-canonical components. If canonical  
179 dosage compensation is active in repressive domains, the MSL complex should occupy those  
180 regions. To address this possibility, we first investigated chromatin occupancy by MOF, the key  
181 writer of the H4K16Ac mark [38] in the MSL complex [12]. MOF also has an MSL-independent  
182 role in regulating a smaller subset of genes in both sexes by participating in Non-Specific Lethal  
183 (NSL) complex [39]. We analyzed genome-wide Chromatin Immunoprecipitation (ChIP) results  
184 [36,40] to determine occupancy of the MSL complex as well as H4K16Ac levels in tissue culture  
185 cells and salivary glands (we measured MOF and H4K16Ac enrichment within gene bodies  
186 because both MOF and H4K16Ac display broad enrichment patterns over these features [39]).  
187 Strikingly, in male *S2* cells, MOF binding in *X* chromosome repressive TADs was significantly  
188 lower than elsewhere on the *X* ( $p < 6.01e-4$ ) and was comparable to occupancy levels on the *X*  
189 in female *Kc* cells (**Figure 2A-C**). H4K16Ac enrichment concurred with MOF occupancy. In all  
190 classes of *X* chromosome repressive TADs, H4K16Ac levels were significantly lower than in  
191 other domains ( $p < 6.96e-09$ , **Figure 2D-F**). H4K16Ac levels on *X*-linked genes was still higher  
192 in *S2* cells than *Kc* cells even within repressive TADs ( $p < 3.02e-09$ ). However, the differences  
193 in H4K16Ac levels between male and female cells were significantly smaller in LAD and Null  
194 domains than non-repressive TADs on the *X* ( $p < 7.14e-04$ , Permutation test). The Black  
195 domain genes showed the same trend, although this was not statistically significant ( $p = 0.27$ ).  
196 Consistent with the MOF occupancy and H4K16Ac enrichment, we observed that MSL-1  
197 occupancy was lower in genes within repressive TADs on the *X* compared to non-repressive  
198 TADs ( $p < 1.11e-12$ , Mann-Whitney U test, **Figure 2G-I**). Thus, the occupancy and activity of  
199 MSL complex is reduced in the case of the dosage compensated *X*-linked genes in *S2* cell  
200 repressive TADs.

201

202 To examine MSL complex activity at the repressive TADs in tissues, we analyzed ChIP results  
203 from sexed larval salivary glands. In males, *X* chromosome MOF binding was significantly  
204 higher at gene bodies in non-repressive TADs, compared to repressive TADs (**Figure 2J-L**,  $p <$



205 2.2e-16). If MOF binding is functional, then the H4K16Ac mark should follow a matching  
206 enrichment pattern. Indeed, H4K16Ac levels were higher at genes in non-repressive TADs  
207 compared to repressive TADs (**Figure 2M-O**,  $p < 2.2e-16$ ). As we observed in the tissue culture  
208 cells, the basal level of H4K16Ac was higher in repressive TADs of the male salivary glands,  
209 compared to that of female glands, despite the fact that MOF occupancy was not significantly  
210 higher in LAD and Black domains ( $p > 0.63$ , **Figure 2P,Q**). This observation indicates that  
211 regulation of repressive TAD genes on the X chromosome occurs with limited or transient  
212 access to MSL complex, but can involve modulations of H4K16Ac in a canonical manner. We  
213 explore the degree of function associated with this lower H4K16ac in a later section.

214  
215 Since the genes within repressive TADs have low occupancy of MSL complex and lower  
216 H4K16ac, we wondered if repressive TADs lack genomic signatures that are required for MSL  
217 complex binding. Specifically, we asked if lower MOF activity correlates with lower density of  
218 the MSL complex entry sites in repressive domains. *Drosophila* MSL complex specifically binds  
219 to X, which occurs at CES [14]. CES contains GA-rich DNA sequence motif, called MRE,  
220 whose introduction to an autosome results in local recruitment of MSL complex to that site [14].  
221 We identified 11,306 MRE motifs from the X chromosome of the reference genome (using an *E*-  
222 value  $< 10e-5$  cutoff). The number of X chromosome MREs in repressive domains was not  
223 statistically different from random (**Figure 2R**,  $p > 0.1$  Permutation test), indicating that the  
224 repressive TADs are not free of MRE motifs. However, when we investigated if genes in  
225 repressive TADs recruit MSL complex to their chromatin regions, we found only 20 overlaps  
226 between LADs and the 150 CES (approximately 57 expected,  $p \ll 0.001$ , Permutation test,  
227 **Figure 2S**) that recruit MSL [14]. We obtained consistent results from Null and Black domains  
228 (**Figure 2R,S**). These observations suggest that, on male X chromosomes, MSL complex does  
229 not efficiently bind genes within the repressive TADs.

230  
231 **X-linked repressive TADs genes are less sensitive to disruption of MSL-complex**  
232 **functions compared to the canonical dosage-compensation target genes.**

233  
234 If the repressive TAD genes are dosage-compensated in a non-canonical way on the male X  
235 chromosome, such genes might be indifferent to MSL complex function. If the low level of  
236 H4K16ac is matched to the generally low level expression of the genes in repressive domains,  
237 compensation of such genes should depend on MSL function. To investigate the impact of  
238 disrupted MSL complex function on X-linked genes in repressive TAD domains, we analyzed

239 gene expression profiles of S2 cells whose MSL components were selectively depleted via  
240 RNAi-mediated knockdown [36,41,42]. When *mof* mRNA was depleted, X-linked genes within  
241 LADs displayed significantly less gene expression reduction; approximately 1.2 fold higher than  
242 genes in non-LAD domains ( $p = 1.1e-13$ , Mann-Whitney U test, **Figure 3A**). We made similar  
243 observations from X chromosome genes that belong to Null and Black domains from the Hi-C  
244 study and occupancy study. They exhibited about 1.1 to 1.3 fold more expression upon the  
245 depletion of *mof* than other X-linked genes in non-repressive domains ( $p < 2.3e-08$ ). As  
246 expected, those chromatin regions that lack MOF binding and H4K16Ac were less sensitive to  
247 the RNAi treatment as well. Genes from regions without enrichment of MOF or H4K16Ac  
248 showed 1.2 fold more expression than the enriched regions ( $p = 1.1e-14$  for MOF, and 0.11 for  
249 the acetylation). MOF is also bound to sites on autosomes as a part of NSL complex, while it  
250 activates only a small subset of genes that the complex binds to [43]. Consistent with this idea,  
251 we saw little down-regulation of overall autosomal gene expression from the *mof* depleted S2  
252 cells ( $p > 0.05$ , **Figure 3B**).

253  
254 We also asked if the expression of X-linked genes in repressive TADs was less sensitive to  
255 depletion of other MSL components. Our analysis showed significantly less reduction in  
256 expression in gene within repressive TADs, relative to non-repressive TADs, when *msl-1* mRNA  
257 was depleted (**Figure 3C,D**,  $p < 0.001$ ). Similarly, *msl-2* and *msl-3* knockdown caused 1.1 to  
258 1.2 fold more X chromosome gene expression from genes in repressive TADs, compared to  
259 non-repressive TADs (**Figure 3E-H**,  $p < 0.01$ ). These results were not due to the inaccurate  
260 detection of low abundant transcripts in hybridization-based techniques (i.e. microarrays)  
261 [44,45]. When we analyzed an independent study that performed RNA-Seq analysis of either  
262 *mof* or *msl-2* depleted S2 cells, we also observed about 1.1 fold more expression from the X-  
263 linked genes within repressive TADs compared to non-repressive TADs ( $p < 0.001$ , **Figure 3I-**  
264 **L**). Therefore, results from the MSL knockdown were consistent with our observation in **Figure**  
265 **2** and suggest that repressive TAD genes on the X chromosome do not rely entirely on MSL  
266 complex for dosage compensation.

267  
268 We inspected MOF occupancy and H4K16Ac enrichment at individual genes in repressive  
269 TADs on the X to determine the patterns of occupancy across the gene bodies. Genes that  
270 were clearly regulated by the canonical dosage compensation machinery (i.e. MSL-dependent)  
271 display broad enrichment signals of MOF and H4K16Ac across the gene body regions, whereas  
272 MSL-independent MOF target genes (e.g. MOFs in NSL complex) show promoter-enriched



273 MOF binding patterns [39]. We observed genes that were sensitive to the *msl* or *mof*  
274 knockdown, for example *CG9947* and *arm*, had broad ChIP signals of MOF and H4K16Ac in  
275 contrast to an autosomal gene, *RpL32*, which has MOF enrichment only at its promoter region  
276 (**Figure 4A-C**). Compared to those canonical MSL target genes, the genes in repressive TAD  
277 regions showed absent MOF binding (**Figure 4D,E**, *CG34330* and *CG9521*), or weak MOF  
278 occupancy (**Figure 4F,G**, *CG8675* and *CG2875*). In all four specific cases, the knockdown of  
279 *mof* or *msl-2* did not lead to statistically significant reduction of gene expression in males ( $p >$   
280  $0.7$ , **Figure 4D-G**), additionally the genes were still fully compensated relative to females in the  
281 salivary glands [male/female expression ratios of 1.02 (*CG34330*), 1.02 (*CG9521*), 1.04  
282 (*CG8675*), and 0.97 (*CG2875*)]. For the latter class of genes that have weak MOF occupancy  
283 (*CG8675* and *CG2875*), we noticed that MOF also bound at the 3' ends of genes. Furthermore,  
284 H4K16Ac enrichment had peaks at the 3' ends as well, which contrasted with the promoter-  
285 focused peaks from NSL-MOF target genes (*RpL32*, **Figure 4A**), suggesting that there was  
286 some residual MSL activity, rather than NSL. The overall insensitivity to MSL RNAi-depletion  
287 suggests that the dosage compensation of these genes does not rely on the MSL complex, but  
288 requires additional mechanisms, such as de-repression.

289

290 **Non-canonical dosage compensation is more evident within TAD boundaries that are**  
291 **maintained between male and female cells.**

292

293 TAD boundaries are stable across different cell types, and even display evolutionary  
294 conservation [46]. Hi-C studies from *Kc* and *S2* cells showed that approximately 74% of TADs  
295 are located at the identical positions between the two cell lines [47]. The overall organization of  
296 X chromosome TADs is highly similar between the two cell lines, and depletion of *msl-2* or *msl-3*  
297 does not alter chromatin conformation of the X [48]. Nevertheless, it is still possible that the  
298 compensation of repressive TAD genes, as well as the increase of histone H4K16Ac (**Figure**  
299 **2D-F, M-O**), are due to topological differences of chromatin between the two cell lines because  
300 the repressive TADs are originally defined from *Kc* cells as well as mixed sex embryos. Testing  
301 the possibility is important in this study for two reasons. First, it is possible that our observation  
302 could result from erroneous mapping of *Kc* cell-based TAD calls to *S2* cells, although this  
303 seems unlikely as MOF occupancy signal is very weak over the repressive TADs in the both cell  
304 lines (**Figure 2A-C, J-L**). Second, considering that CESs are enriched at TAD boundaries, from  
305 where the MSL complex spreads out based on proximity [48], if TAD structures differ between

306 male and female cells, the architectural difference could contribute to the non-canonical dosage  
307 compensation.

308  
309 To test the effects of potentially different TAD structure between lines and/or sexes, we  
310 investigated X-linked gene dosage compensation where TAD locations did not match between  
311 the two cell lines. For this purpose, we subclassified repressive TADs into four groups [47],  
312 which divided regions that are: within TAD boundaries in both *Kc* and S2 cell lines (TT); either  
313 at boundaries or interspace between two large TADs in both cell lines (II); and within large TADs  
314 from only one of the cell lines (TI or IT, **Figure 5A**). The proportion of mismatches in TADs and  
315 their boundary locations (e.g. TT and II versus TI and IT) did not show bias based on autosome  
316 and X chromosome location, even in repressive TAD regions ( $p > 0.1$  for all repressive TADs,  
317 Fisher's exact test with Bonferroni correction, **Figure 5B-D**). This observation indicates that  
318 sex-specific alteration of TAD structures are unlikely to drive non-canonical male X chromosome  
319 dosage compensation. We also investigated the possible function of sex-specific TADs, by  
320 asking if knockdown of MSL components had a greater effect on repressive TADs domains  
321 specific to male S2 cells (IT). However, this was not the case. Instead, we observed that the  
322 genes within repressive TAD domains and boundaries whose TAD locations were well-matched  
323 between the two cell lines (TT and II) were better compensated than the others (TI and IT) after  
324 depleting MSL components (**Figure 5E-G**). For example, LAD-associated genes from TT or II  
325 class regions demonstrated excellent dosage compensation after *msl-2* knockdown compared  
326 to the same genes from the control RNAi samples (0.94 fold,  $p = 0.047$ , Mann-Whitney U test,  
327 **Figure 5E**). We observed the same trend when we looked at genes from Null and Black  
328 domains (**Figure 5F,G**). In conclusion, these results suggest that our observation of non-  
329 canonical dosage compensation is not due to sex-specific modification of large TAD structures  
330 between male and female cells. TAD that differ between female *Kc* and male S2 cells may be  
331 due to the rearrangements in these highly aneuploid cells, not differences in sexual identity.

## 332 333 **Discussion**

334  
335 A subset of X chromosome genes that are unbound by MOF still dosage compensate [49]. We  
336 have studied X chromosome dosage compensation of genes within repressive TADs in  
337 *Drosophila*, and their association with MSL dosage compensation complexes and activities.  
338 Our results revealed that genes from such repressive TADs are compensated with minimal

339 contributions from MSL. We suggest those regions are able to achieve dosage compensation  
340 due to the weaker repressive TADs on the unpaired male chromosome.

341  
342 This non-canonical compensation may be the same as observed in the case of autosomal  
343 deletions within or at the boundaries of repressive TADs [28]. These deletions have a dominant  
344 de-repressing effect, which results in partial dosage compensation for the hemizygous segment,  
345 and over-expression of genes in flanking two-dose regions (**Figure 6A,B**). These data suggest  
346 that repressive domains are established, strengthened, or stabilized by the existence of  
347 homologous pairs of chromosomes. There is strong precedent for pairing-dependent  
348 mechanisms in *D. melanogaster* that are known to activate or repress genes when homologous  
349 chromosomes are proximally located [29–32]. We suggest that the unpaired X chromosomes of  
350 males have weaker repressive domains than the same domains in the paired X chromosomes  
351 of females (**Figure 6C,D**). Thus, one can think of this as dosage compensation mediated by  
352 partial X inactivation in females, with de-repression in males. This model hinges on the  
353 reorganization of the nuclear lamina-DNA interaction, which can clearly regulate gene activities  
354 during cell differentiation even in the absence of global changes of the nuclear architecture [50].  
355 For example, in mouse embryonic stem cells, loss of the tethering in the *Hdac3* deletion  
356 releases genomic regions of lineage-specific genes from nuclear lamina resulting in precocious  
357 expression of those genes [51].

358  
359 De-repression of one-dose genes in males is reminiscent of the *C. elegans* dosage  
360 compensation mechanism (**Figure 6E,F**). In *C. elegans*, XX individuals are hermaphrodites and  
361 XO individuals are males. Both X chromosomes in hermaphrodites are subjected to dosage  
362 compensation control by repression [3,5,16]. The process involves DCC complex-dependent  
363 chromatin remodeling in XX hermaphrodites [20–22], that includes enrichment for H4K20me1  
364 and depletion for H4K16Ac. In XO worms, the X shows decondensation [23]. In addition to the  
365 chromatin remodeling, there is local positioning of both X chromosomes of hermaphrodites to  
366 the LADs at the nuclear periphery which contributes to the repression of X-linked gene  
367 expression; the loss of this tethering results in de-repression of X-linked genes in  
368 hermaphrodites [27]. The de-repression of X-linked genes in tethering mutants of *cec-4* or *lem-*  
369 *2*, which encode a chromodomain protein or a component of nuclear lamina, respectively,  
370 results in a less extreme compensation phenotype than DCC mutants, raising the possibility that  
371 tethering to the nuclear lamina is an additional or supplemental mechanism to achieve dosage

372 compensation by repression in *XX* individuals [27]. Thematically, this is identical to the non-  
373 canonical model for *Drosophila* dosage compensation that we propose.

374

375 *X* chromosome dosage compensation by de-repression appears to rely on a general feature of  
376 repressive domains, requiring very little evolutionary innovation. As sex chromosomes evolve  
377 from an autosomal pair, the sex chromosome specific to the heterogametic sex, becomes  
378 recombinationally silent and accumulates inversions, insertions, and pseudogenes that further  
379 disrupt pairing [52–54]. As this process occurs, partial dosage compensation by de-repression  
380 would be an immediate response, not requiring the evolution of any specific machinery.  
381 Improved dosage compensation can evolve to boost gene expression in *XY* males and by  
382 enhancing repression in *XX* females. This could account for some of the commonality between  
383 *D. melanogaster* and *C. elegans* despite their divergence ~ 1 billion of years ago [55,56].

384

385 The MSL complex does not function specifically on the *X* chromosome in the male germline of  
386 *D. melanogaster* [57,58], although they may be dosage compensated [59] (but also see [60]).  
387 There is a clear depletion of genes with male biased expression in regions of high MSL  
388 occupancy [61], but given that these specific MSL sites do not appear to be used in the male  
389 germline, the suggestion that MSL drives these genes to other locations seems spurious. We  
390 have shown that the regions without MSL entries sites correspond to the repressive TADs.  
391 Thus, we propose that *X*-linked genes with male germline functions are more likely to be in  
392 repressive TADs, where they can show increased expression as a result of de-repression.  
393 Indeed, in our previous results from gene expression profiling of hemizygote flies with  
394 autosomal deletions [28], we observed that genes with male-biased expression are de-  
395 repressed in females. There has been strong evolutionary pressure to relocate genes with male  
396 germline function off the *X* chromosomes [62–64]. Those that remain might use de-repression  
397 to achieve high expression even on the single *X*.

398

## 399 **Conclusion**

400

401 Our results collectively suggest that MSL complex-independent *X* chromosome dosage  
402 compensation exists in *Drosophila melanogaster*. We suggest that this non-canonical dosage  
403 compensation mechanism involves de-repression of one-dose *X* chromosome genes in males,  
404 which are repressed in their two-dose state in females. Our results have an implication for the *X*  
405 chromosome dosage compensation mechanism before the evolution of the MSL complex.

406

## 407 **Materials and Methods**

408

### 409 **TADs information used in this study**

410 We obtained LAD information from [65], HiC domains from [35], and DamID-based chromatin  
411 domains from [34]. All these results were generated based on *Drosophila* reference genome  
412 release 5. We used Flybase 5.57 gene model [66] in describing genes within such TADs. We  
413 defined genes to belong to TADs only when both boundaries of a gene locate in a TAD region.  
414 We performed our gene ontology analysis in FlyMine version 45.1 [67]. Results in the  
415 Additional File 1 represents significantly enriched terms, adjusted  $p$  value  $< 0.05$ , after Holm-  
416 Bonferroni correction. Hi-C based TAD boundary information for *S2* and *Kc* cells were obtained  
417 from [47].

418

### 419 ***Drosophila* cell line data from modENCODE studies**

420 We used our previous results on RNA-Seq expression profiles of *Drosophila Kc* and *S2* cells  
421 [37] for this study after updating gene IDs to Flybase 5.57. We used FPKM  $> 1$  as an  
422 expression cutoff based on the top 99th percentile of the intergenic FPKM signals (0.87 and  
423 0.98 for *Kc* and *S2* cells, respectively). We used following chromatin immunoprecipitation  
424 (ChIP)-on-chip results from modENCODE study (model organism ENcyclopedia of DNA  
425 Elements, [40]. modENCODE submission IDs 3043 and 3044 for MOF binding in *Kc* and *S2*  
426 cells, respectively, ID 318 for Histone H4K16 acetylation in *Kc* cells, and IDs 319 and 320 for *S2*  
427 cells. In our description of H4K16 acetylation levels in *S2* cells in **Figure 2**, we used median  
428 values from these two different submissions. We obtained MSL-1 binding results from  
429 modENCODE submission ID 3293. These datasets can also be obtained from Gene  
430 Expression Omnibus (GEO, [68] with these accession IDs: GSE27805-6, GSE20797-9, and  
431 GSE32762. modENCODE study [40] provided smoothed log-intensity values between ChIP  
432 signal and the input signal, called M values, whose processed mean is shifted to 0. We used  
433 median M values within gene boundaries in describing MOF/MSL-1 binding or H4K16  
434 acetylation in **Figure 2A-I**. MOF binding and H4K16 acetylation enriched/not-enriched regions  
435 in **Figure 3** directly followed peak calls from the original study.

436

### 437 **Salivary gland expression profiles and ChIP-Seq results**

438 We obtained microarray expression profiling and ChIP-Seq results from the 3rd instar larva  
439 salivary glands for MOF binding and Histone H4K16 acetylation from [36]. The gene

440 expression profiles were provided as GCRMA (GC Robust Multi-array Average, [69]-normalized  
441 signal intensities, and we used the top 95 percentiles of signals from non-*Drosophila* control  
442 probes as an expression cutoff. We demonstrated the median values from three replicates in  
443 **Figure 1C-E**. The original results can be found from ArrayExpress [70] with accession ID of E-  
444 MEXP-3506. ChIP-Seq results for MOF binding and H4K16 acetylation, from the same study,  
445 can be accessed with ArrayExpress ID E-MTAB-911. In the result, the authors performed  
446 analysis with DESeq [71] to calculate log<sub>2</sub> fold changes between ChIP and input samples for  
447 non-overlapping 25 bp windows across the genome. We used median values of such log<sub>2</sub> fold  
448 changes within gene boundaries in describing the ChIP results in **Figure 2J-O**.

449

#### 450 **MSL entry sites**

451

452 We used 150 CES that were characterized by ChIP-chip and ChIP-Seq studies [14] to generate  
453 a position weight matrix for DCC binding using MEME (Multiple EM for Motif Elicitation) suite  
454 version 4.11.2 [72]. We set the length of the motif to be 21 bp to match with the original CES  
455 study. Using the position weight matrix, we identified locations with MREs across the  
456 *Drosophila* genome release 5. We used FIMO 4.11.2 (Find Individual Motif Occurrences, [73] in  
457 this identification with *Expect* value (*E*-value) threshold of 1.0e-05. In our description of  
458 MRE/CES occurrence in **Figure 2**, we randomly shuffled positions of TADs on *X* chromosome  
459 genome using Bedtools 2.26.0 [74] while preserved the sizes of TADs. The results in **Figure**  
460 **2R,S** demonstrate overlap between such shuffled TADs and MRE/CES from 2,000  
461 randomizations.

462

#### 463 **S2 cell RNAi results for MSL knockdown**

464 We used *mof*, *msl-1*, *msl-3* knockdown results from a microarray study [36], ArrayExpress E-  
465 MEXP-1505). For the estimation of gene expression changes, we used Robust Multi-array  
466 Average (RMA, [75] method for background adjustment and normalization, and filtered out  
467 genes of which FPKM value is less than 1 from the S2 cell RNA-Seq result [37]. We use R  
468 limma package version 3.28.21 [76] as in the official manual for our differential expression  
469 analysis. We obtained the microarray study of the *msl-2* knockdown data from [41]. We  
470 conducted same data handling process as above. We also re-analyzed RNA-Seq results from  
471 [42] (GEO GSE16344). We used HISAT 2.0.4 [77] for the mapping of sequencing reads to  
472 *Drosophila* genome release 5. We used a parameter for unpaired sequencing (-U) in running  
473 HISAT. We measured gene-level read abundances with HTSeq 0.6.1 [77] with the default



474 setting. From the counting result, we used polyA<sup>+</sup> protein coding genes that have more than 1  
475 count per million mapped reads from any of the four samples (two controls and two RNAi) in our  
476 differential expression analysis. We performed differential expression analysis using DESeq2  
477 [78]. In **Figure 3** and **Figure 5**, we demonstrated genes of which expression is more than 1  
478 FPKM, which we also used to filter microarray results from MSL knockdown.

479

480

#### 481 **List of abbreviations**

482 CES:Chromosome Entry Sites, ChIP: Chromatin Immunoprecipitation, DCC: Dosage  
483 Compensation Complex, FPKM: Fragments Per Kilobase of transcript per Million mapped  
484 reads, GEO: Gene Expression Omnibus, GO: Gene Ontology, H4K16Ac: Histone H4 Lysine 16  
485 Acetylation, HAS: High-Affinity Sites, LAD: Lamina-Associated Domains, MLE: Maleless,  
486 modENCODE: model organism ENcyclopedia of DNA Elements, MOF: Males absent on the  
487 first, MRE: MSL-recognition element, MSL: Male specific lethal complex, NAR: Nucleoporin-  
488 Associated Region, NSL: Non-Specific Lethal, TAD: Topologically Associated Domain.

489

490

#### 491 **Declarations**

#### 492 **Ethics approval and consent to participate**

493 Not applicable

494

#### 495 **Consent for publication**

496 Not applicable

497

#### 498 **Availability of data and material**

499 The datasets analysed during the current study are available in the GEO and ArrayExpress  
500 repositories. We used modENCODE ChIP-chip results that are available in GEO with these  
501 accession IDs: GSE27805-6, GSE20797-9, and GSE32762. The salivary glands results are in  
502 ArrayExpress (E-MTAB-911 and E-MEXP-3506). We re-analyzed MSL complex knockdown  
503 results from GEO GSE16344 and ArrayExpress E-MEXP-1505.

504

#### 505 **Competing interests**

506 The authors declare that they have no competing interests

507

508 **Funding**

509 This work was supported by the Intramural Research Programs of the National Institutes of  
510 Health (NIH), National Institute of Diabetes and Digestive and Kidney Diseases, to BO, and  
511 Korean Visiting Scientist Training Award (KVSTA, HI13C1282) to HL.

512

513 **Authors' contributions**

514 HL and BO conceived of the idea and designed the analyses. HL performed computational  
515 analysis on the presented results. HL and BO interpreted and wrote the manuscript.

516

517 **Acknowledgements**

518 We thank the members of the Oliver lab for their helpful discussions and Dr. Per Stenberg and  
519 Dr. Sergey V. Razin for kindly sharing processed results from their studies. We utilized the  
520 high-performance computational capabilities of the Biowulf linux cluster at the NIH, Bethesda,  
521 MD. This research was supported by the Intramural Research Program of the NIH, The  
522 National Institute of Diabetes and Digestive and Kidney Diseases (NIDDK).

523

524

525

## 526 **Figure Legends**

527 **Figure 1. Repressive TAD genes display lower gene expression levels and are dosage-**  
528 **compensated in male cells. (A)** Venn-diagram displays overlap among the three repressive  
529 TADs that are described in this study. **(B)** Pie charts demonstrate proportion of repressive TAD  
530 genes (gray) vs. non-repressive TAD genes (white) in *Drosophila* genome. In (A) and (B), only  
531 protein-coding polyA<sup>+</sup> genes are counted. The numbers do not directly indicate numbers of  
532 “expressed” genes in each TAD. **(C-H)** Gene expression levels from the repressive TAD genes  
533 (gray) and non-repressive TAD genes (white) based on LAD (C,F), Hi-C (D,G), and chromatin  
534 occupancy studies (E,H). The top two rows show RNA-Seq results from *Drosophila* cell lines  
535 (unit: log<sub>2</sub> FPKM, C-E), and the bottom two rows are from microarray study done with larval  
536 salivary glands (unit: normalized signal intensity, E-H). Intergenic signals from the 99th  
537 percentiles and below in RNA-Seq analyses, as well as background signals from the 95th  
538 percentiles and below in microarray results are indicated. **(I)** Comparisons of X chromosome  
539 gene expression levels from the repressive TADs between female and male salivary glands.  
540 Boxplots indicate the distribution of gene expression levels above expression cutoffs. Middle  
541 lines in box display medians of each distribution. Top of the box. 75th percentile. Bottom of the  
542 box. 25th percentile. Whiskers indicate the maximum, or minimum, observation within 1.5 times  
543 of the box height from the top, or the bottom of the box, respectively. Notches show 95%  
544 confidence interval for the medians. \*\*\*  $p < 0.001$  from Mann-Whitney U test. The same format  
545 and test have been used for all boxplots appeared in this study.

546  
547 **Figure 2. Repressive TAD genes have a limited binding of MSL complex. (A-I)** Chromatin  
548 immunoprecipitation (ChIP) results from MOF binding (A-C), Histone H4K16 acetylation (D-F),  
549 and MSL-1 binding (G-I) are summarized as boxplots for *Drosophila* cell lines (*Kc* and *S2*).  
550 Gene level ChIP signals are separately shown based on LAD (A,D,G), Hi-C (B,E,H) and  
551 chromatin occupancy (C,F,I) study results. **(J-O)** ChIP results from the 3rd instar larval salivary  
552 glands. \*\*  $p < 0.01$ , \*\*\*  $p < 0.001$ . **(P, Q)** Direct comparisons of MOF binding (P) and H4K16Ac  
553 enrichment (Q) between female and male salivary glands from (J-O). **(R, S)** The histogram  
554 represents expected numbers overlaps between repressive TADs and MRE (R), or CES (S).  
555 We performed random shuffling of the X chromosome genome 2,000 times and demonstrated  
556 the frequencies of the numbers of overlaps. Red lines. the actual number of overlaps between  
557 LADs, and MREs or CES's.  $p$  values are from permutation tests.

558

559 **Figure 3. Different responses from the repressive vs. non-repressive TAD genes upon**  
560 **knockdown of a MSL complex component.** Boxplots represent gene expression changes in  
561 log<sub>2</sub> scale from depletion of MSL components in *Drosophila* S2 cells. Plots are based on three  
562 independent studies [36,41,42], which used either microarray (A-H) or RNA-Seq technology (I-  
563 L). **(A, B)** Differential gene expression from *mof* knockdown cells. Changes from the repressive  
564 TADs (left three columns, LAD, Null, and Black) as well as MOF binding, or Histone H4K16  
565 acetylation regions are presented. **(C-H)** Results from *misl-1*, *misl-2*, or *misl-3* knockdown. **(I, J)**  
566 Results from *mof* knockdown, measured by RNA-Seq analysis. **(K, L)** *misl-2* knockdown.  
567 **(A,C,E,G,I,K)** Changes from X chromosome genes. **(B,D,F,H,J,L)** Changes from autosomal  
568 genes. \*  $p < 0.05$ , \*\*  $p < 0.01$ , \*\*\*  $p < 0.001$

570 **Figure 4. Repressive TAD genes that are less sensitive to *misl* or *mof* knockdown lack**  
571 **MOF enrichment at their gene bodies.** Top four panels demonstrate normalized ChIP signals  
572 of MOF and H4K16Ac from S2 cells as well as male salivary glands. The bottom three panels  
573 display RNA-Seq read coverages from our re-analysis of Zhang et al [42]. The plots are scaled  
574 based on their maximum coverage from one of the three samples: control RNAi, *mof* RNAi, and  
575 *misl-2* RNAi (indicated in the square brackets). Note that there is no sample-to-sample  
576 normalization because the total number of reads are similar across the three samples; 7.2, 7.5  
577 and 8.1 million mapped reads for the control, *mof* RNAi, and *misl-2* RNAi samples, respectively.  
578 **(A)** An autosomal gene (*RpL32*). **(B, C)** Canonical MSL targets genes. *CG9947* (B) and *arm*  
579 (C). **(D-E)** Repressive target genes that are compensated via the non-canonical dosage  
580 compensation. *CG34430* (D), *CG9521* (E), *CG8675* (F), and *CG2875* (G).

582 **Figure 5. Repressive TAD-based dosage compensation occurs at where X chromosome**  
583 **TAD structures are maintained between female and male cells.** **(A)** Schematic illustration of  
584 classification of TAD differences between *Kc* and S2 cells based on [47] (modified with  
585 permission by the authors) **(B-D)** Percentage of the number of 2kb windows from four different  
586 classes of TAD difference between *Kc* and S2 cells (TT, II, TI, and IT); windows that are found  
587 from within TAD boundaries in both *Kc* and S2 cells (TT), that are at boundaries or interspace  
588 between TADs in both *Kc* and S2 cells (II), that are found within the TAD boundaries in *Kc* cells  
589 but not in S2 cells (TI), and that are not in TAD boundaries in *Kc* cells but within TAD  
590 boundaries in S2 cells (IT). Top. distribution of 2kb windows from all autosomes. Bottom.  
591 Distribution of 2kb windows from X chromosomes. **(E-G)** Gene expression changes of X-linked  
592 genes in S2 cells upon RNAi knockdown of *mof*, *misl-1*, *misl-2*, and *misl-3* as appeared in Figure

593 3 but based on TAD difference classes (TT, II, TI, and IT). Changes from repressive TADs  
594 (grey) and non-repressive TADs (white) are displayed. *P* values indicate differences from the  
595 median gene expression fold changes of non-LAD associated genes. \*  $p < 0.05$ , \*\*  $p < 0.01$ , \*\*\*  
596  $p < 0.001$

597  
598 **Figure 6. Models demonstrating the parallelism among dosage compensation of**  
599 **autosomal dosage compensation in hemizygous *D. melanogaster*, and X chromosome**  
600 **dosage compensation in *C. elegans* and *D. melanogaster*. (A, B) A proposal of de-**  
601 **repression mediated compensation of one-dose autosomal genes in hemizygous *D.***  
602 ***melanogaster* based on our previous study [28]. (C, D) A model of X chromosome dosage**  
603 **compensation in *D. melanogaster* based on the current study as well as other references**  
604 **[5,7,14,39,41,48,79,80]. (E, F) A model of X chromosome dosage compensation in *C. elegans***  
605 **based on the references [16,20–23,26,27,81].**

606

607

## 608 **References**

- 609 1. Birchler JA, Veitia RA. Gene balance hypothesis: connecting issues of dosage sensitivity  
610 across biological disciplines. *Proc Natl Acad Sci U S A*. 2012;109:14746–53.
- 611 2. Sheltzer JM, Amon A. The aneuploidy paradox: costs and benefits of an incorrect karyotype.  
612 *Trends Genet*. 2011;27:446–53.
- 613 3. Ercan S. Mechanisms of x chromosome dosage compensation. *J Genomics*. 2015;3:1–19.
- 614 4. Disteche CM. Dosage compensation of the sex chromosomes. *Annu Rev Genet*.  
615 2012;46:537–60.
- 616 5. Ferrari F, Alekseyenko AA, Park PJ, Kuroda MI. Transcriptional control of a whole  
617 chromosome: emerging models for dosage compensation. *Nat Struct Mol Biol*. 2014;21:118–25.
- 618 6. Lucchesi JC, Kelly WG, Panning B. Chromatin remodeling in dosage compensation. *Annu*  
619 *Rev Genet*. 2005;39:615–51.
- 620 7. Lucchesi JC, Kuroda MI. Dosage compensation in *Drosophila*. *Cold Spring Harb Perspect*  
621 *Biol* [Internet]. 2015;7. Available from: <http://dx.doi.org/10.1101/cshperspect.a019398>
- 622 8. Larschan E, Bishop EP, Kharchenko PV, Core LJ, Lis JT, Park PJ, et al. X chromosome  
623 dosage compensation via enhanced transcriptional elongation in *Drosophila*. *Nature*.  
624 2011;471:115–8.
- 625 9. Conrad T, Cavalli FMG, Vaquerizas JM, Luscombe NM, Akhtar A. *Drosophila* dosage  
626 compensation involves enhanced Pol II recruitment to male X-linked promoters. *Science*.  
627 2012;337:742–6.

- 628 10. Straub T, Becker PB. Comment on “Drosophila dosage compensation involves enhanced  
629 Pol II recruitment to male X-linked promoters.” *Science*. 2013;340:273.
- 630 11. Ferrari F, Jung YL, Kharchenko PV, Plachetka A, Alekseyenko AA, Kuroda MI, et al.  
631 Comment on “Drosophila dosage compensation involves enhanced Pol II recruitment to male X-  
632 linked promoters.” *Science*. 2013;340:273.
- 633 12. Gelbart ME, Kuroda MI. Drosophila dosage compensation: a complex voyage to the X  
634 chromosome. *Development*. 2009;136:1399–410.
- 635 13. Straub T, Grimaud C, Gilfillan GD, Mitterweger A, Becker PB. The chromosomal high-affinity  
636 binding sites for the Drosophila dosage compensation complex. *PLoS Genet*. 2008;4:e1000302.
- 637 14. Alekseyenko AA, Peng S, Larschan E, Gorchakov AA, Lee O-K, Kharchenko P, et al. A  
638 sequence motif within chromatin entry sites directs MSL establishment on the Drosophila X  
639 chromosome. *Cell*. 2008;134:599–609.
- 640 15. Disteché CM. Dosage compensation of the sex chromosomes and autosomes. *Semin Cell  
641 Dev Biol*. 2016;56:9–18.
- 642 16. Lau AC, Csankovszki G. Balancing up and downregulation of the *C. elegans* X  
643 chromosomes. *Curr Opin Genet Dev*. 2015;31:50–6.
- 644 17. Deng X, Hiatt JB, Nguyen DK, Ercan S, Sturgill D, Hillier LW, et al. Evidence for  
645 compensatory upregulation of expressed X-linked genes in mammals, *Caenorhabditis elegans*  
646 and *Drosophila melanogaster*. *Nat Genet*. 2011;43:1179–85.
- 647 18. Gupta V, Parisi M, Sturgill D, Nuttall R, Doctolero M, Dudko OK, et al. Global analysis of X-  
648 chromosome dosage compensation. *J Biol*. 2006;5:3.
- 649 19. McDonel P, Jans J, Peterson BK, Meyer BJ. Clustered DNA motifs mark X chromosomes  
650 for repression by a dosage compensation complex. *Nature*. 2006;444:614–8.
- 651 20. Vielle A, Lang J, Dong Y, Ercan S, Kotwaliwale C, Rechtsteiner A, et al. H4K20me1  
652 contributes to Downregulation of X-Linked Genes for *C. elegans* Dosage Compensation. *PLoS  
653 Genet*. Public Library of Science; 2012;8:e1002933.
- 654 21. Kramer M, Kranz A-L, Su A, Winterkorn LH, Albritton SE, Ercan S. Developmental  
655 Dynamics of X-Chromosome Dosage Compensation by the DCC and H4K20me1 in *C. elegans*.  
656 *PLoS Genet*. 2015;11:e1005698.
- 657 22. Wells MB, Snyder MJ, Custer LM, Csankovszki G. *Caenorhabditis elegans* dosage  
658 compensation regulates histone H4 chromatin state on X chromosomes. *Mol Cell Biol*.  
659 2012;32:1710–9.
- 660 23. Lau AC, Zhu KP, Brouhard EA, Davis MB, Csankovszki G. An H4K16 histone  
661 acetyltransferase mediates decondensation of the X chromosome in *C. elegans* males.  
662 *Epigenetics Chromatin*. 2016;9:44.
- 663 24. Petty EL, Collette KS, Cohen AJ, Snyder MJ, Csankovszki G. Restricting dosage  
664 compensation complex binding to the X chromosomes by H2A.Z/HTZ-1. *PLoS Genet*.  
665 2009;5:e1000699.



- 666 25. Crane E, Bian Q, McCord RP, Lajoie BR, Wheeler BS, Ralston EJ, et al. Condensin-driven  
667 remodelling of X chromosome topology during dosage compensation. *Nature*. 2015;523:240–4.
- 668 26. Kruesi WS, Core LJ, Waters CT, Lis JT, Meyer BJ. Condensin controls recruitment of RNA  
669 polymerase II to achieve nematode X-chromosome dosage compensation. *Elife*.  
670 2013;2:e00808.
- 671 27. Snyder MJ, Lau AC, Brouhard EA, Davis MB, Jiang J, Sifuentes MH, et al. Anchoring of  
672 Heterochromatin to the Nuclear Lamina Reinforces Dosage Compensation-Mediated Gene  
673 Repression. *PLoS Genet*. 2016;12:e1006341.
- 674 28. Lee H, Cho D-Y, Whitworth C, Eisman R, Phelps M, Roote J, et al. Effects of Gene Dose,  
675 Chromatin, and Network Topology on Expression in *Drosophila melanogaster*. *PLoS Genet*.  
676 2016;12:e1006295.
- 677 29. Kassis JA. Unusual properties of regulatory DNA from the *Drosophila engrailed* gene: three  
678 “pairing-sensitive” sites within a 1.6-kb region. *Genetics*. 1994;136:1025–38.
- 679 30. Kassis JA. 14 - Pairing-Sensitive Silencing, Polycomb Group Response Elements, and  
680 Transposon Homing in *Drosophila*. In: Dunlap JC, Wu C-T, editors. *Advances in Genetics*.  
681 Academic Press; 2002. p. 421–38.
- 682 31. Morris JR, Chen JL, Geyer PK, Wu CT. Two modes of transvection: enhancer action in trans  
683 and bypass of a chromatin insulator in cis. *Proc Natl Acad Sci U S A*. 1998;95:10740–5.
- 684 32. Lee AM, Wu C-T. Enhancer-promoter communication at the yellow gene of *Drosophila*  
685 *melanogaster*: diverse promoters participate in and regulate trans interactions. *Genetics*.  
686 2006;174:1867–80.
- 687 33. van Bemmelen JG, Pagie L, Braunschweig U, Brugman W, Meuleman W, Kerkhoven RM, et  
688 al. The insulator protein SU(HW) fine-tunes nuclear lamina interactions of the *Drosophila*  
689 genome. *PLoS One*. 2010;5:e15013.
- 690 34. Fillion GJ, van Bemmelen JG, Braunschweig U, Talhout W, Kind J, Ward LD, et al. Systematic  
691 protein location mapping reveals five principal chromatin types in *Drosophila* cells. *Cell*.  
692 2010;143:212–24.
- 693 35. Sexton T, Yaffe E, Kenigsberg E, Bantignies F, Leblanc B, Hoichman M, et al. Three-  
694 dimensional folding and functional organization principles of the *Drosophila* genome. *Cell*.  
695 2012;148:458–72.
- 696 36. Conrad T, Cavalli FMG, Holz H, Hallaceli E, Kind J, Ilik I, et al. The MOF chromobarrel  
697 domain controls genome-wide H4K16 acetylation and spreading of the MSL complex. *Dev Cell*.  
698 2012;22:610–24.
- 699 37. Lee H, McManus CJ, Cho D-Y, Eaton M, Renda F, Somma MP, et al. DNA copy number  
700 evolution in *Drosophila* cell lines. *Genome Biol*. 2014;15:R70.
- 701 38. Akhtar A, Becker PB. Activation of transcription through histone H4 acetylation by MOF, an  
702 acetyltransferase essential for dosage compensation in *Drosophila*. *Mol Cell*. 2000;5:367–75.
- 703 39. Kind J, Vaquerizas JM, Gebhardt P, Gentzel M, Luscombe NM, Bertone P, et al. Genome-  
704 wide analysis reveals MOF as a key regulator of dosage compensation and gene expression in

- 705 *Drosophila*. *Cell*. 2008;133:813–28.
- 706 40. Kharchenko PV, Alekseyenko AA, Schwartz YB, Minoda A, Riddle NC, Ernst J, et al.  
707 Comprehensive analysis of the chromatin landscape in *Drosophila melanogaster*. *Nature*.  
708 2011;471:480–5.
- 709 41. Hamada FN, Park PJ, Gordadze PR, Kuroda MI. Global regulation of X chromosomal genes  
710 by the MSL complex in *Drosophila melanogaster*. *Genes Dev*. 2005;19:2289–94.
- 711 42. Zhang Y, Malone JH, Powell SK, Perival V, Spana E, Macalpine DM, et al. Expression in  
712 aneuploid *Drosophila* S2 cells. *PLoS Biol*. 2010;8:e1000320.
- 713 43. Feller C, Prestel M, Hartmann H, Straub T, Söding J, Becker PB. The MOF-containing NSL  
714 complex associates globally with housekeeping genes, but activates only a defined subset.  
715 *Nucleic Acids Res*. 2012;40:1509–22.
- 716 44. Malone JH, Oliver B. Microarrays, deep sequencing and the true measure of the  
717 transcriptome. *BMC Biol*. 2011;9:34.
- 718 45. Zhao S, Fung-Leung W-P, Bittner A, Ngo K, Liu X. Comparison of RNA-Seq and microarray  
719 in transcriptome profiling of activated T cells. *PLoS One*. 2014;9:e78644.
- 720 46. Dixon JR, Selvaraj S, Yue F, Kim A, Li Y, Shen Y, et al. Topological domains in mammalian  
721 genomes identified by analysis of chromatin interactions. *Nature*. 2012;485:376–80.
- 722 47. Ulianov SV, Khrameeva EE, Gavrillov AA, Flyamer IM, Kos P, Mikhaleva EA, et al. Active  
723 chromatin and transcription play a key role in chromosome partitioning into topologically  
724 associating domains. *Genome Res*. 2016;26:70–84.
- 725 48. Ramírez F, Lingg T, Toscano S, Lam KC, Georgiev P, Chung H-R, et al. High-Affinity Sites  
726 Form an Interaction Network to Facilitate Spreading of the MSL Complex across the X  
727 Chromosome in *Drosophila*. *Mol Cell*. 2015;60:146–62.
- 728 49. Philip P, Stenberg P. Male X-linked genes in *Drosophila melanogaster* are compensated  
729 independently of the Male-Specific Lethal complex. *Epigenetics Chromatin*. 2013;6:35.
- 730 50. Peric-Hupkes D, Meuleman W, Pagie L, Bruggeman SWM, Solovei I, Brugman W, et al.  
731 Molecular maps of the reorganization of genome-nuclear lamina interactions during  
732 differentiation. *Mol Cell*. 2010;38:603–13.
- 733 51. Poleshko A, Shah PP, Gupta M, Babu A, Morley MP, Manderfield LJ, et al. Genome-Nuclear  
734 Lamina Interactions Regulate Cardiac Stem Cell Lineage Restriction. *Cell* [Internet]. 2017;  
735 Available from: <http://dx.doi.org/10.1016/j.cell.2017.09.018>
- 736 52. Charlesworth D, Charlesworth B, Marais G. Steps in the evolution of heteromorphic sex  
737 chromosomes. *Heredity*. 2005;95:118–28.
- 738 53. Bachtrog D. Sex chromosome evolution: molecular aspects of Y-chromosome degeneration  
739 in *Drosophila*. *Genome Res*. 2005;15:1393–401.
- 740 54. Ellegren H. Sex-chromosome evolution: recent progress and the influence of male and  
741 female heterogamety. *Nat Rev Genet*. 2011;12:157–66.

- 742 55. Blair Hedges S. The origin and evolution of model organisms. *Nat Rev Genet.* Nature  
743 Publishing Group; 2002;3:838–49.
- 744 56. Krylov DM, Wolf YI, Rogozin IB, Koonin EV. Gene loss, protein sequence divergence, gene  
745 dispensability, expression level, and interactivity are correlated in eukaryotic evolution. *Genome*  
746 *Res.* 2003;13:2229–35.
- 747 57. Rastelli L, Richman R, Kuroda MI. The dosage compensation regulators MLE, MSL-1 and  
748 MSL-2 are interdependent since early embryogenesis in *Drosophila*. *Mech Dev.* 1995;53:223–  
749 33.
- 750 58. Franke A, Dernburg A, Bashaw GJ, Baker BS. Evidence that MSL-mediated dosage  
751 compensation in *Drosophila* begins at blastoderm. *Development.* The Company of Biologists  
752 Ltd; 1996;122:2751–60.
- 753 59. Lott SE, Villalta JE, Schroth GP, Luo S, Tonkin LA, Eisen MB. Noncanonical compensation  
754 of zygotic X transcription in early *Drosophila melanogaster* development revealed through  
755 single-embryo RNA-seq. *PLoS Biol.* 2011;9:e1000590.
- 756 60. Meiklejohn CD, Landeen EL, Cook JM, Kingan SB, Presgraves DC. Sex chromosome-  
757 specific regulation in the *Drosophila* male germline but little evidence for chromosomal dosage  
758 compensation or meiotic inactivation. *PLoS Biol.* 2011;9:e1001126.
- 759 61. Bachtrog D, Toda NRT, Lockton S. Dosage compensation and demasculinization of X  
760 chromosomes in *Drosophila*. *Curr Biol.* 2010;20:1476–81.
- 761 62. Parisi M, Nuttall R, Naiman D, Bouffard G, Malley J, Andrews J, et al. Paucity of genes on  
762 the *Drosophila* X chromosome showing male-biased expression. *Science.* 2003;299:697–700.
- 763 63. Sturgill D, Zhang Y, Parisi M, Oliver B. Demasculinization of X chromosomes in the  
764 *Drosophila* genus. *Nature.* 2007;450:238–41.
- 765 64. Reinke V, Smith HE, Nance J, Wang J, Van Doren C, Begley R, et al. A global profile of  
766 germline gene expression in *C. elegans*. *Mol Cell.* 2000;6:605–16.
- 767 65. van Bommel JG, Pagie L, Braunschweig U, Brugman W, Meuleman W, Kerkhoven RM, et  
768 al. The Insulator Protein SU(HW) Fine-Tunes Nuclear Lamina Interactions of the *Drosophila*  
769 Genome. *PLoS One.* Public Library of Science; 2010;5:e15013.
- 770 66. McQuilton P, St Pierre SE, Thurmond J, FlyBase Consortium. FlyBase 101--the basics of  
771 navigating FlyBase. *Nucleic Acids Res.* 2012;40:D706–14.
- 772 67. Lyne R, Smith R, Rutherford K, Wakeling M, Varley A, Guillier F, et al. FlyMine: an  
773 integrated database for *Drosophila* and *Anopheles* genomics. *Genome Biol.* 2007;8:R129.
- 774 68. Barrett T, Wilhite SE, Ledoux P, Evangelista C, Kim IF, Tomashevsky M, et al. NCBI GEO:  
775 archive for functional genomics data sets--update. *Nucleic Acids Res.* 2013;41:D991–5.
- 776 69. Wu Z, Irizarry RA, Gentleman R, Martinez-Murillo F, Spencer F. A Model-Based Background  
777 Adjustment for Oligonucleotide Expression Arrays. *J Am Stat Assoc.* 2004;99:909–17.
- 778 70. Kolesnikov N, Hastings E, Keays M, Melnichuk O, Tang YA, Williams E, et al. ArrayExpress  
779 update--simplifying data submissions. *Nucleic Acids Res.* 2015;43:D1113–6.

- 780 71. Anders S, Huber W. Differential expression analysis for sequence count data. *Genome Biol.*  
781 2010;11:R106.
- 782 72. Bailey TL, Boden M, Buske FA, Frith M, Grant CE, Clementi L, et al. MEME SUITE: tools for  
783 motif discovery and searching. *Nucleic Acids Res.* 2009;37:W202–8.
- 784 73. Grant CE, Bailey TL, Noble WS. FIMO: scanning for occurrences of a given motif.  
785 *Bioinformatics.* 2011;27:1017–8.
- 786 74. Quinlan AR, Hall IM. BEDTools: a flexible suite of utilities for comparing genomic features.  
787 *Bioinformatics.* 2010;26:841–2.
- 788 75. Irizarry RA, Hobbs B, Collin F, Beazer-Barclay YD, Antonellis KJ, Scherf U, et al.  
789 Exploration, normalization, and summaries of high density oligonucleotide array probe level  
790 data. *Biostatistics.* 2003;4:249–64.
- 791 76. Ritchie ME, Phipson B, Wu D, Hu Y, Law CW, Shi W, et al. limma powers differential  
792 expression analyses for RNA-sequencing and microarray studies. *Nucleic Acids Res.*  
793 2015;43:e47.
- 794 77. Kim D, Langmead B, Salzberg SL. HISAT: a fast spliced aligner with low memory  
795 requirements. *Nat Methods.* 2015;12:357–60.
- 796 78. Love MI, Huber W, Anders S. Moderated estimation of fold change and dispersion for RNA-  
797 seq data with DESeq2. *Genome Biol.* 2014;15:550.
- 798 79. Vaquerizas JM, Suyama R, Kind J, Miura K, Luscombe NM, Akhtar A. Nuclear pore proteins  
799 nup153 and megator define transcriptionally active regions in the *Drosophila* genome. *PLoS*  
800 *Genet.* 2010;6:e1000846.
- 801 80. Larschan E, Bishop EP, Kharchenko PV, Core LJ, Lis JT, Park PJ, et al. X chromosome  
802 dosage compensation via enhanced transcriptional elongation in *Drosophila*. *Nature. Nature*  
803 *Research;* 2011;471:115–8.
- 804 81. Albritton SE, Ercan S. *Caenorhabditis elegans* Dosage Compensation: Insights into  
805 Condensin-Mediated Gene Regulation. *Trends Genet.* 2018;34:41–53.

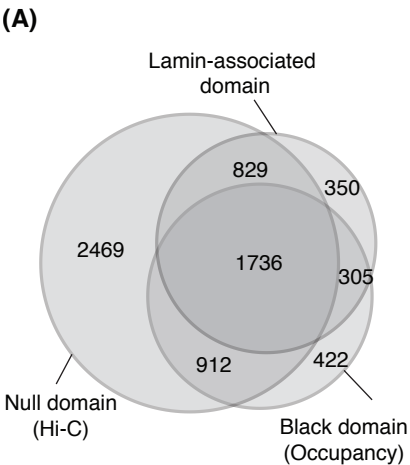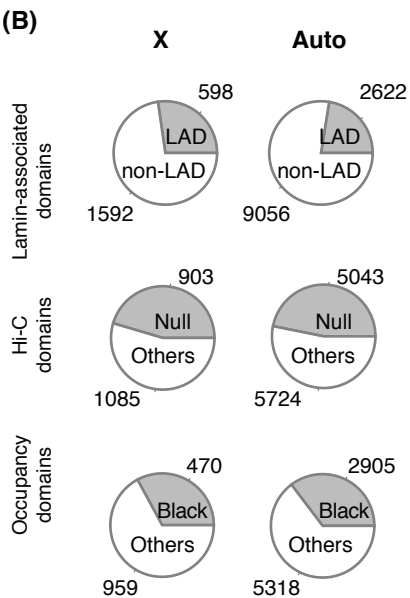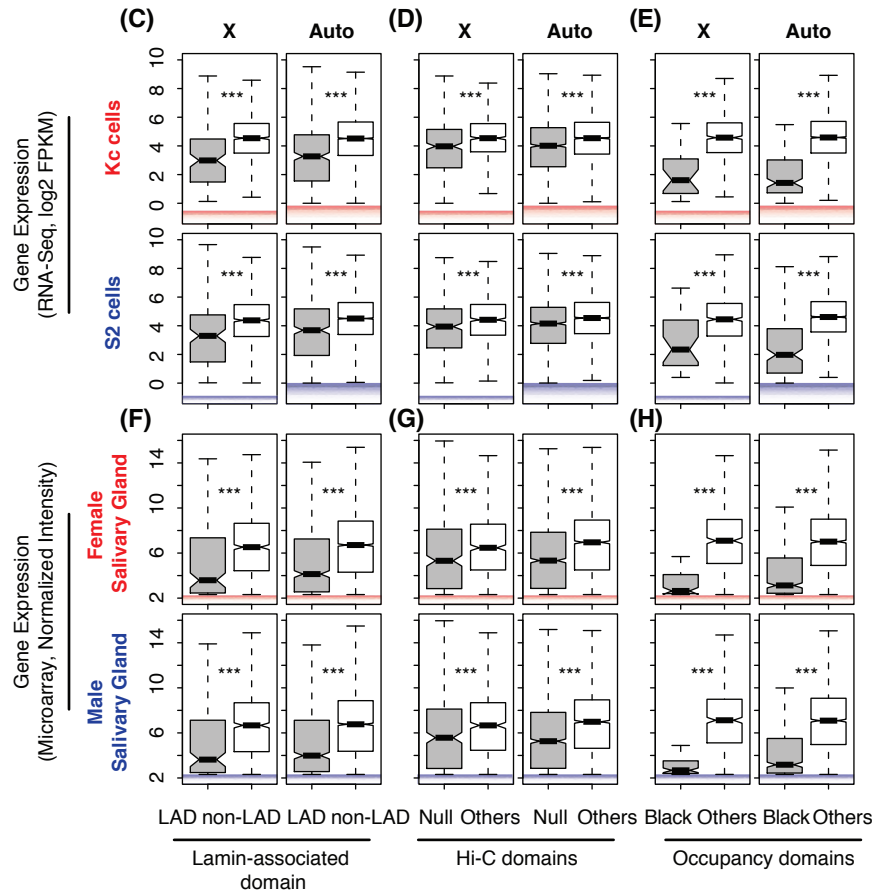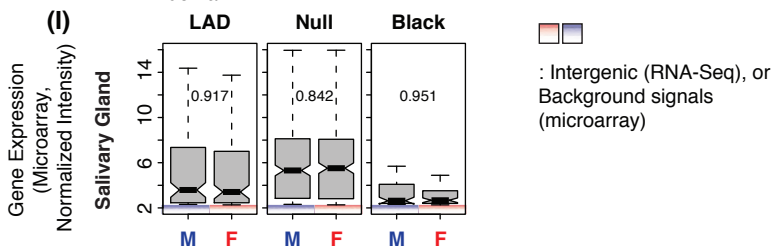

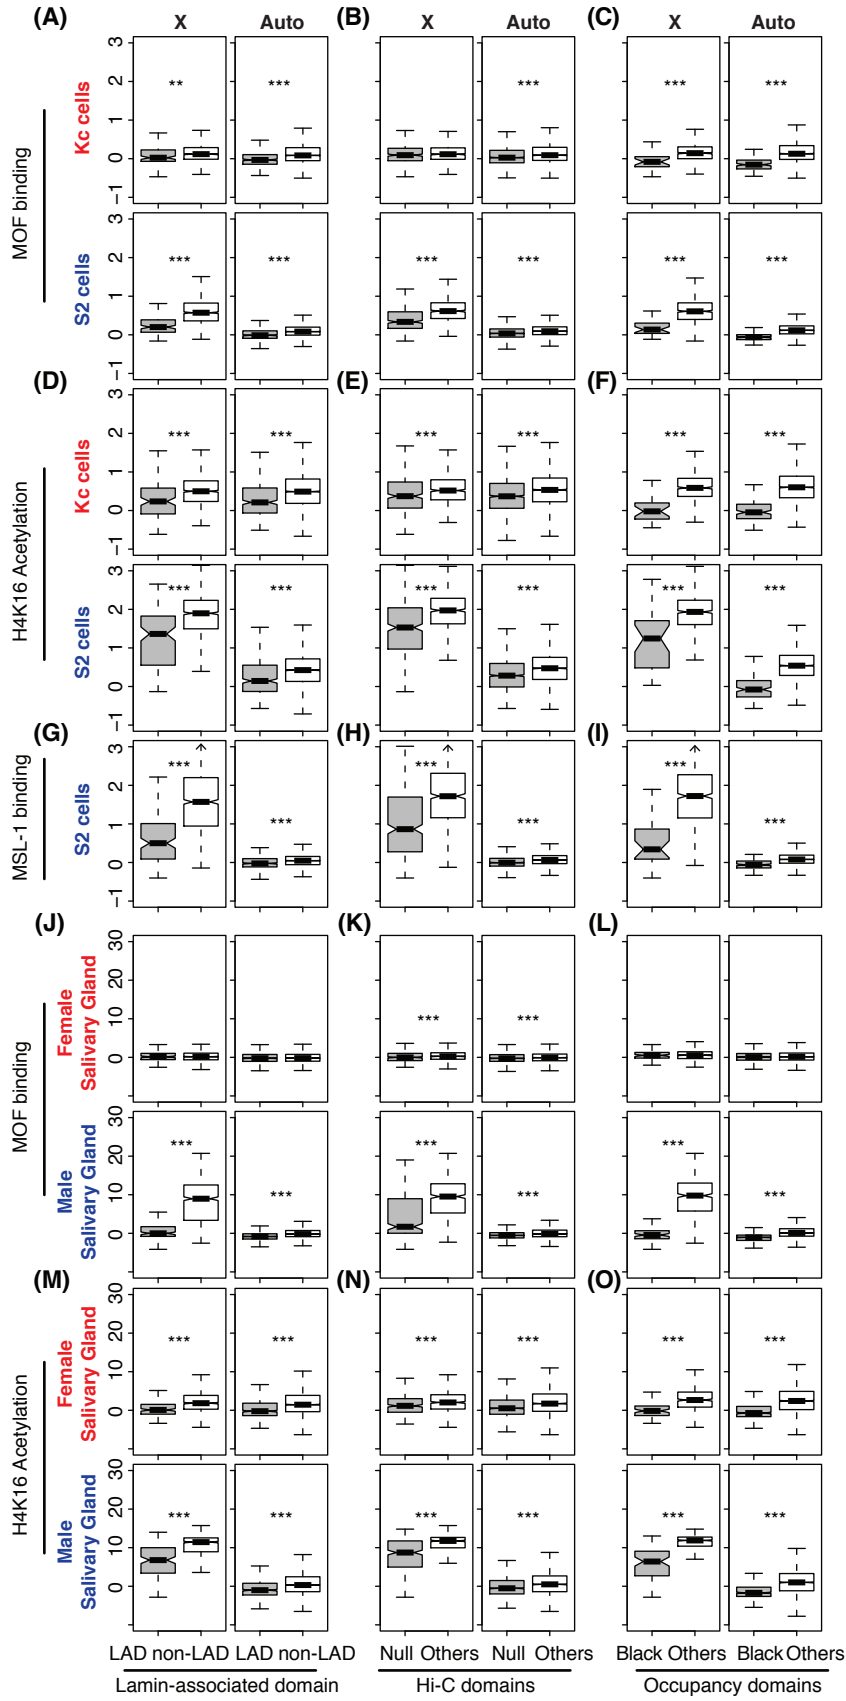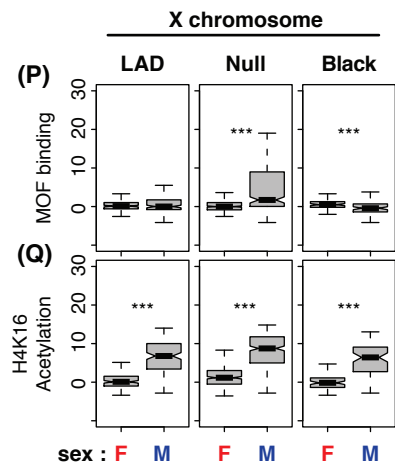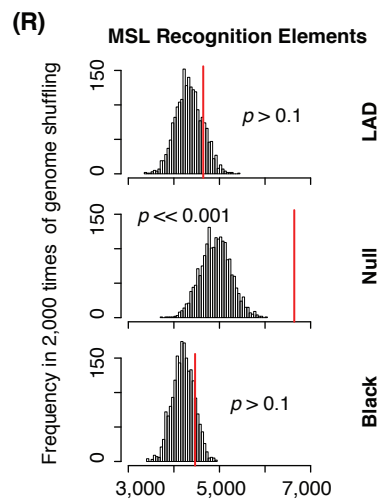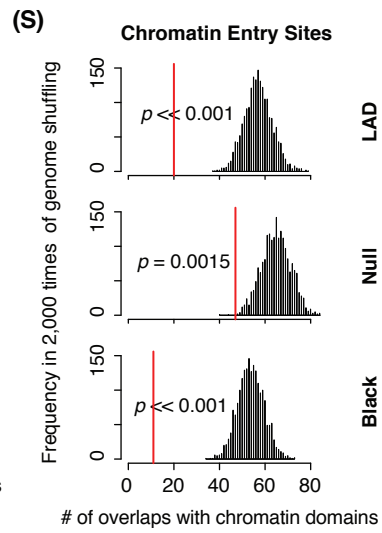



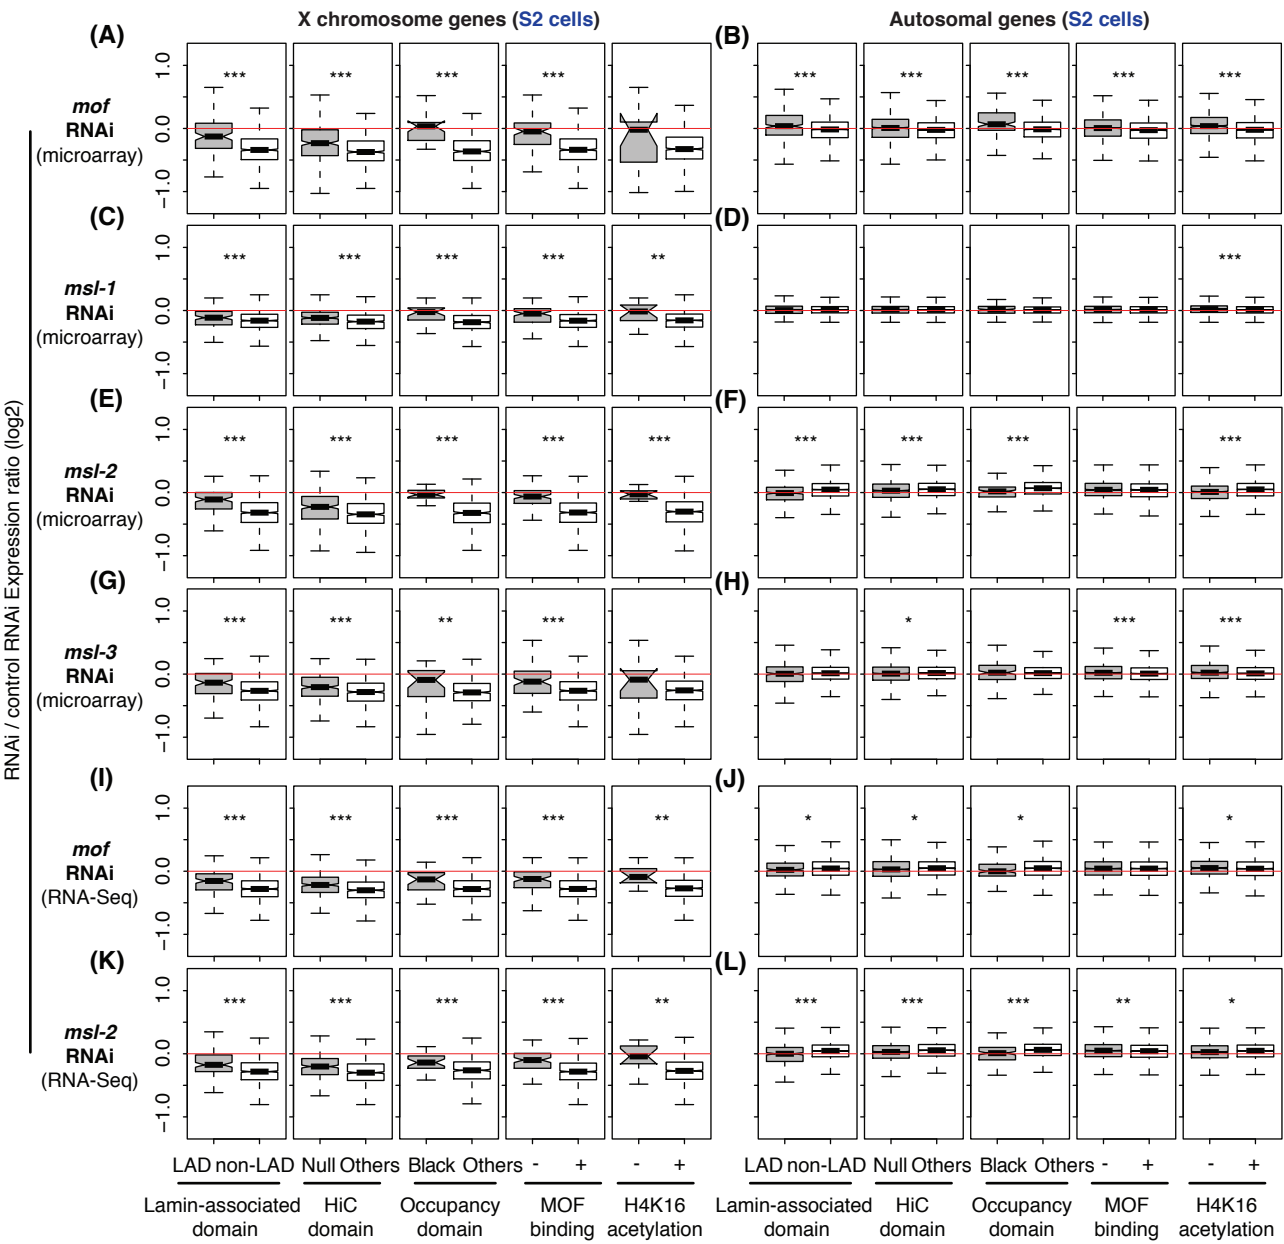

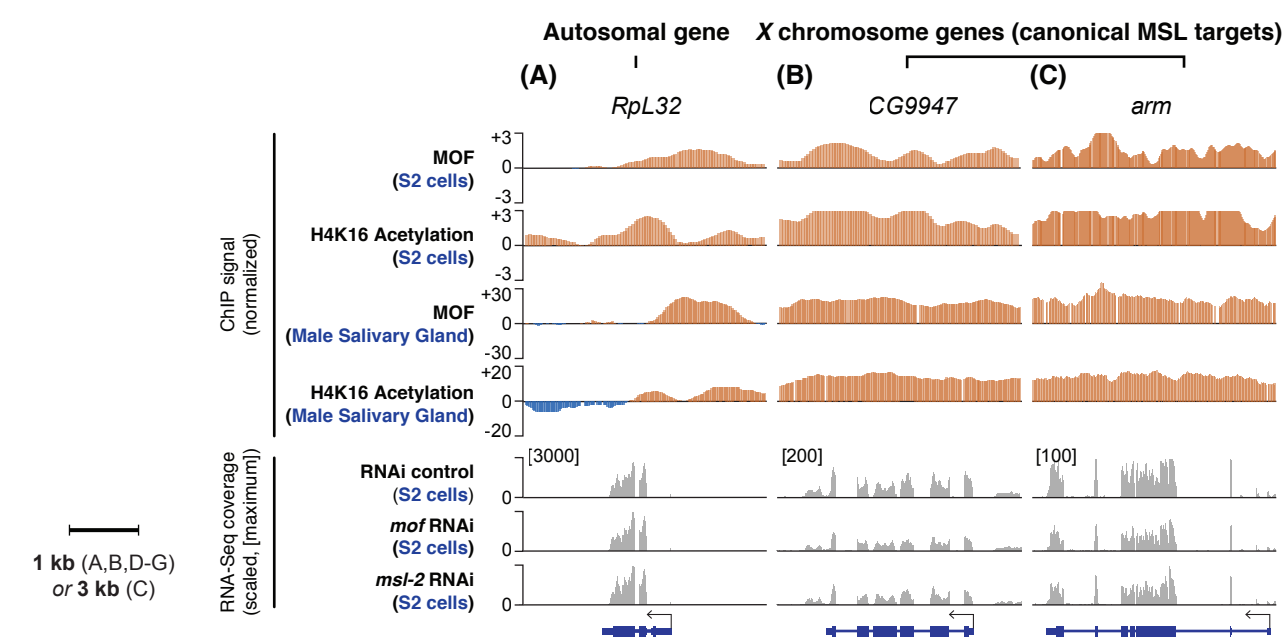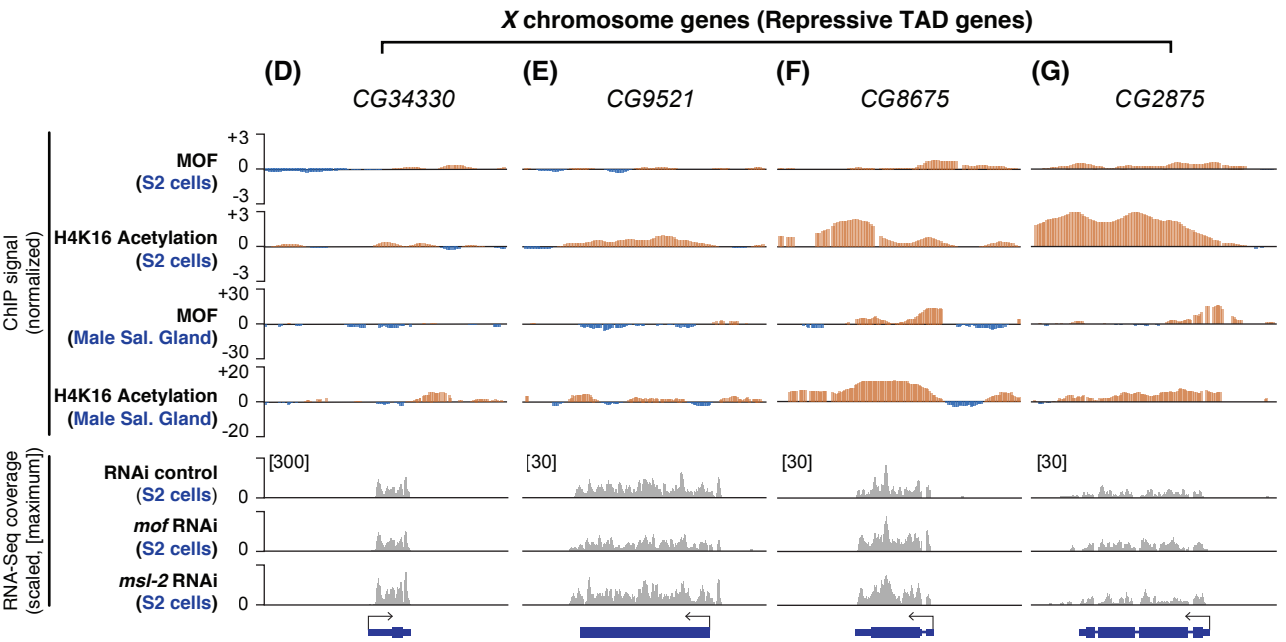

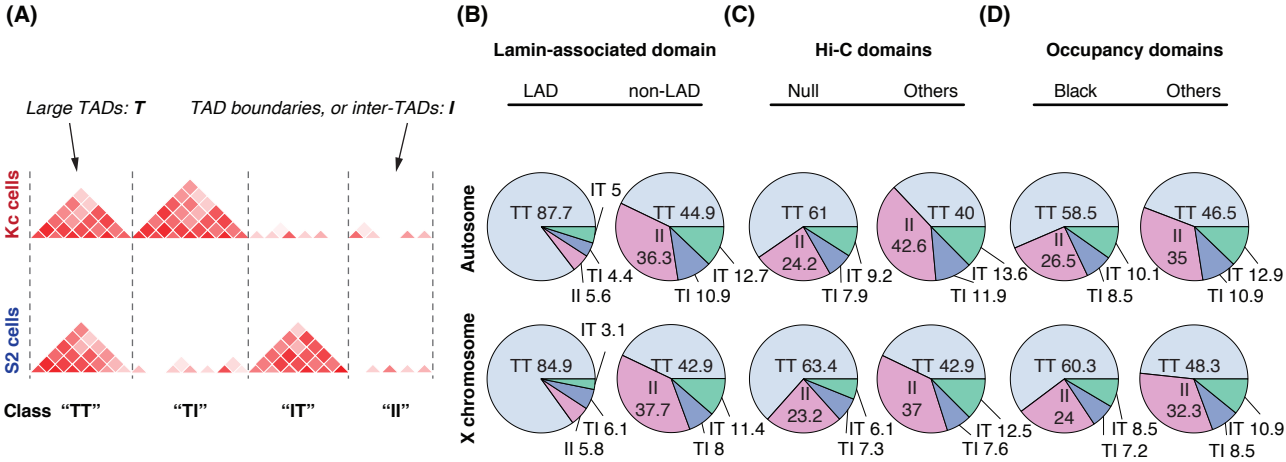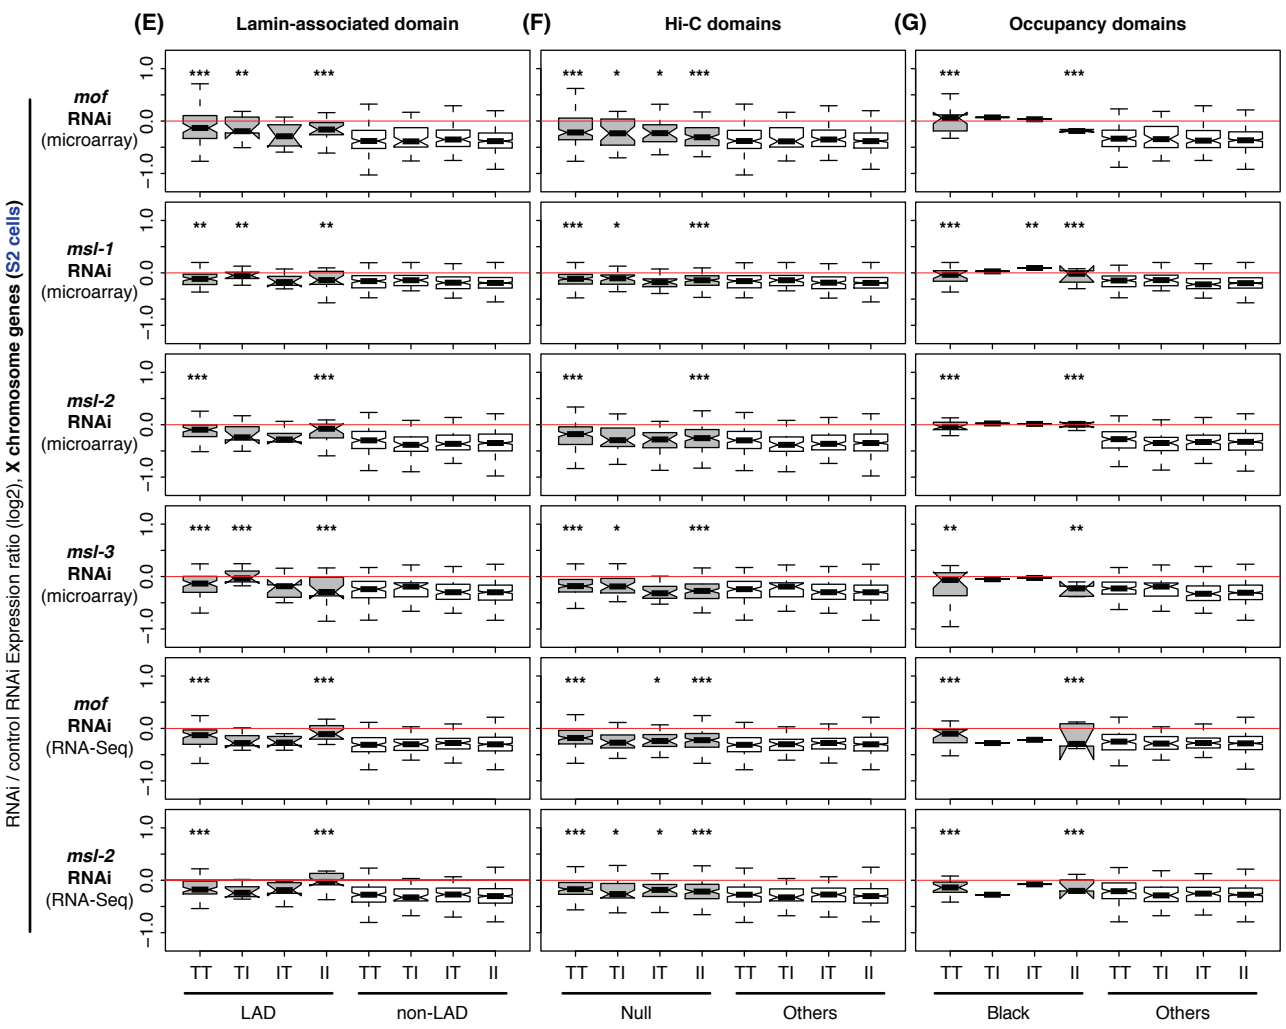

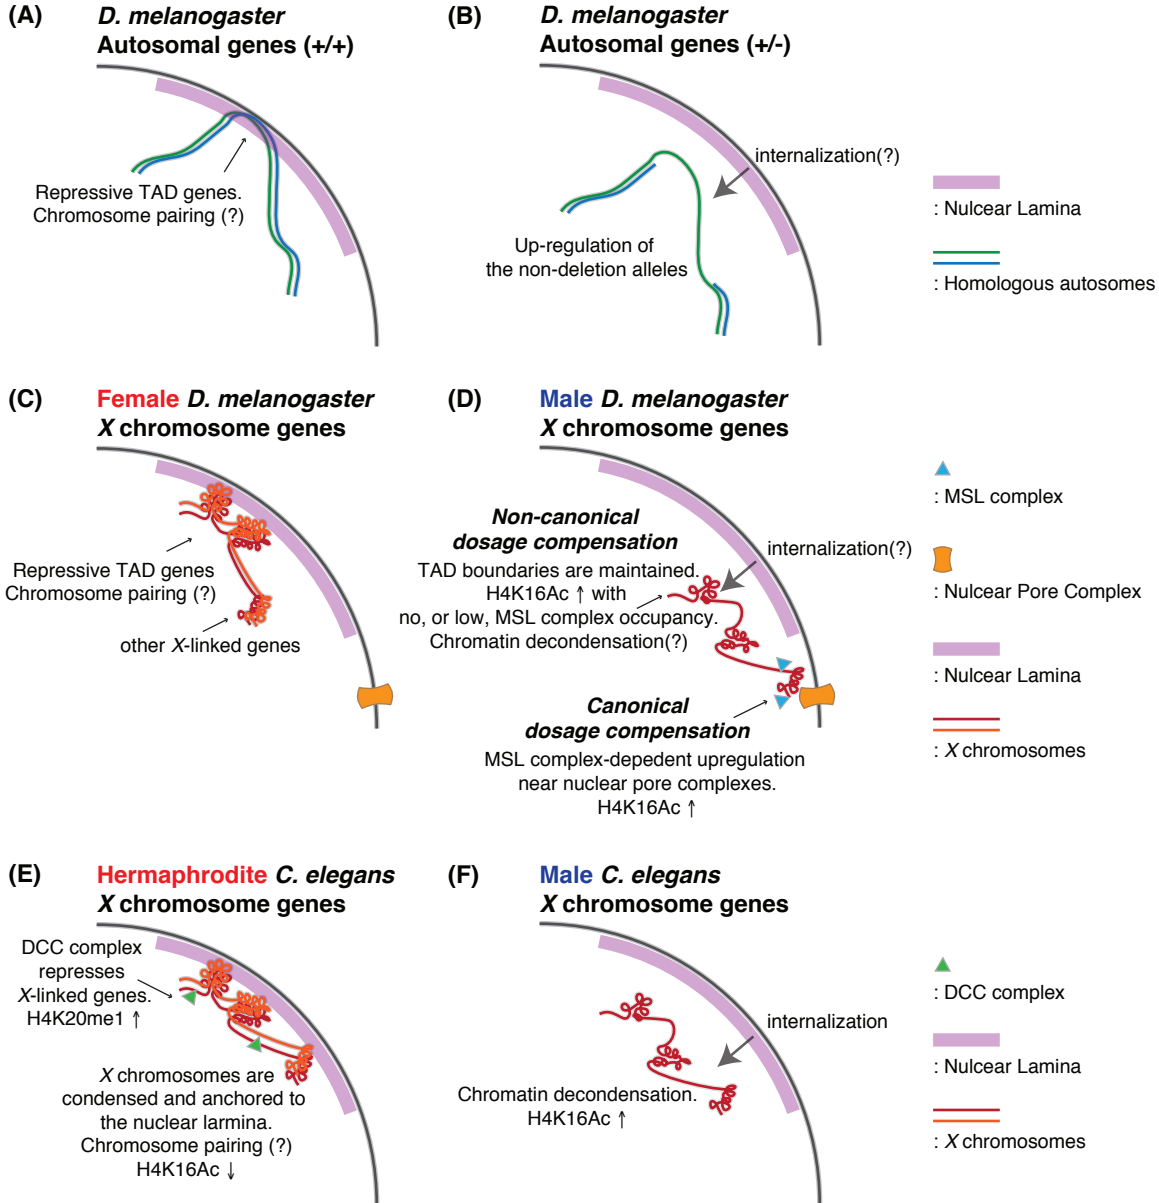

Source: http://biorxiv.org/content/10.1101/427443v1.full.pdf
